# Supplementary material for: Effectiveness of SARS-CoV-2 vaccination in patients with rheumatoid arthritis (RA) on DMARDs: as determined by antibody and T cell responses
Source: HighWire-hosted journal article supplement (doi:10.1136/rmdopen-2021-002050), 2022-03-01
Supplement: rmdopen-2021-002050supp001_data_supplement.pdf [file rmdopen-2021-002050supp001_data_supplement.pdf]

## Supplementary methods.

### Serological testing

Testing was performed according to the manufacturer's instruction locally adapted for performance at half-volume.

### T cell analysis

PBMC were thawed and viable cells resuspended in AIM-V serum free media onto the ELISpot plate ( $2.5 \times 10^5$  viable cells/well) and exposed to negative control, antigen mixtures containing peptides derived from either the Spike protein or NP, or PHA (positive control). Plates were incubated overnight at  $37^\circ\text{C}$  with 5%  $\text{CO}_2$ . After cell removal, alkaline phosphate conjugated anti IFN gamma antibody incubation, followed by BCIP/NBTplus substrate incubation, the plates were dried and spots (SFU) counted. The reference range was determined by the manufacturer. A significant test was determined by subtracting the SFU in the negative control from the number of SFU in the stimulated wells. A signal of greater than 10 SFU in the negative control invalidated that sample. Results were interpreted according to the manufacturer as: negative 0-4 SFU, borderline 5-7 SFU, weak positive 8-15 SFU, positive 16-30 SFU and strong positive  $>30$  SFU.

### Interferon (IFN) core analysis

IFN score was calculated as the average of the natural logarithm of IFN-induced chemokines (6). High IFN scores ( $>2\text{STDEV}$  of healthy control population) predict worsening of clinical outcome of IFN-related dcSSc disease (7). Samples were diluted 1:2 and assayed according to the manufacturer's instructions and analysed using a Luminex 200 instrument with xPonent 4.2.

## Results

### Responses after second SARS-CoV-2 vaccination in patients with absent seroconversion.

Antibody response after second vaccine: were as follows: abatacept 3/6 (50%), RTX 7/14 (50%), anti-TNF 5/9 (56%), JAKi 2/3 (67%) and anti-IL6 2/3 (67%), and  $p=0.971$ . Eight of 15 (53%) patients on concomitant MTX seroconverted. For patients treated with RTX; treatment time  $\leq 6$  months compared to  $>6$  months was associated with a reduced seroconversion rate 3/9 (33%) vs. 6/9 (67%)  $p=0.094$ .

### Efficacy post vaccine

The participants were questioned whether they had contracted PCR confirmed COVID-19 infection, 9 months after the start of the study. In addition, the patient electronic case notes were reviewed for evidence of COVID-19 infection. There were 8 SARS -CoV-2 confirmed symptomatic cases during the study follow-up. Four patients on RTX, 3 with anti-TNF, 1 with anti-IL6 and 1 healthy control. Of the 2 patients with absent seroconversion (both received treatment with RTX) after the first doses of the vaccine, one patient failed to convert after the second dose but had strong T cell responses and had mild symptoms. The other patient had void T cell responses and didn't attend for the post second vaccine bloods as was already

unwell with COVID symptoms. The latter patient was the only patient to be admitted to hospital. Of note none of 8 cases had pre vaccine SARS-CoV-2 exposure.
